# Supplementary material for: The Influence of Image Properties on High-Detail SfM Photogrammetric Surveys of Complex Geometric Landforms: The Application of a Consumer-Grade UAV Camera in a Rock Glacier Survey
Source: MDPI journal article supplement (doi:10.3390/rs14153528), 2022-07-23
Supplement: s1 [file s1]

**Table S1.** Camera calibration coefficients from Agisoft Metashape (v.1.5.5).

|    | DNG         |          | JPEG        |          | TIFF.def    |          | TIFF.mod |          |
|----|-------------|----------|-------------|----------|-------------|----------|----------|----------|
|    | Value       | Error    | Value       | Error    | Value       | Error    | Value    | Error    |
| F  | 4262.38     | 0.022    | 4265.47     | 0.028    | 4262.32     | 0.022    | 4263.02  | 0.022    |
| Cx | -30.6747    | 0.011    | -56.6024    | 0.012    | -30.4369    | 0.01     | -30.6679 | 0.011    |
| Cy | -46.5261    | 0.0075   | -52.8967    | 0.0084   | -46.3912    | 0.0074   | -46.821  | 0.0076   |
| B1 | 3.18808     | 0.0024   | 4.36907     | 0.0029   | 3.1528      | 0.0024   | 3.08997  | 0.0024   |
| B2 | 7.87891     | 0.0024   | -0.0830738  | 0.0029   | 7.73549     | 0.0024   | 8.20929  | 0.0024   |
| K1 | -0.19094    | 2.00E-05 | -0.0176213  | 3.10E-05 | -0.191121   | 2.00E-05 | -0.19107 | 2.00E-05 |
| K2 | -0.0324923  | 0.00012  | -0.0126907  | 0.00022  | -0.031969   | 0.00011  | -0.03268 | 0.00011  |
| K3 | 0.0950055   | 0.00026  | 0.0554669   | 0.00059  | 0.0941149   | 0.00025  | 0.095483 | 0.00026  |
| K4 | -0.0391965  | 0.00019  | -0.0657208  | 0.00055  | -0.0386376  | 0.00019  | -0.0393  | 0.00019  |
| P1 | 0.000148772 | 2.90E-07 | -0.00312143 | 9.30E-07 | 0.000154449 | 2.90E-07 | 0.00015  | 2.90E-07 |
| P2 | 0.000277046 | 3.20E-07 | -0.00176017 | 6.00E-07 | 0.000270033 | 3.20E-07 | 0.000288 | 3.20E-07 |
